# Supplementary material
Source: PubMed Central journal article supplement (PMC6145732)
Supplement: jamaoncol-4-e173776-s001.pdf [file jamaoncol-4-e173776-s001.pdf]

## Supplementary Online Content

Lheureux S, Butler MO, Clarke B, et al. Association of ipilimumab with safety and antitumor activity in women with metastatic or recurrent HPV-related cervical carcinoma. *JAMA Oncol*. Published online November 16, 2017.  
doi:10.1001/jamaoncol.2017.3776

**eTable 1.** Overall Toxicities Possibly Related to Ipilimumab for Run-In Phase 1 and Phase 2

**eTable 2.** DAB-Stained for Immune Markers as Part of the Trial

**eFigure 1.** Immunohistochemistry on Paired Tumor Biopsies

**eFigure 2.** Flow Cytometry Plots for PD-1 and ICOS on CD4+ and CD8+ CD3+ T Cells

This supplementary material has been provided by the authors to give readers additional information about their work.

**eTable 1. Overall Toxicities Possibly Related to Ipilimumab for Run-In  
Phase 1 and Phase 2**

**1A. Clinical toxicities**

| <b>Adverse Events</b> | <b>All Grade<br/>n pts (%)</b> | <b>Grade <math>\geq</math>3<br/>n pts</b> |
|-----------------------|--------------------------------|-------------------------------------------|
| Fatigue               | 16 (38.1%)                     | 2                                         |
| Anemia                | 11 (26.2%)                     | 4                                         |
| Nausea                | 11 (26.2%)                     | 1                                         |
| Anorexia              | 10 (23.8%)                     | 1                                         |
| Vomiting              | 7 (16.7%)                      | 1                                         |
| Dehydration           | 5 (11.9%)                      | 2                                         |
| Edema limbs           | 4 (9.5%)                       | 0                                         |
| Dyspnea               | 3 (7.1%)                       | 1                                         |
| Abdominal pain        | 3 (7.1%)                       | 0                                         |
| Weight loss           | 2 (4.8%)                       | 1                                         |
| Back pain             | 2 (4.8%)                       | 0                                         |
| Pain                  | 2 (4.8%)                       | 0                                         |
| Lung infection        | 1 (2.4%)                       | 1                                         |

## 1B. Biological Toxicities

| <b>Adverse Events</b>             | <b>All Grade<br/>n pts (%)</b> | <b>Grade <math>\geq</math>3<br/>n pts</b> |
|-----------------------------------|--------------------------------|-------------------------------------------|
| Lymphocyte count decreased        | 7 (16.7%)                      | 1                                         |
| Hypo albuminemia                  | 7 (16.7%)                      | 1                                         |
| Hypomagnesemia                    | 5 (11.9%)                      | 1                                         |
| Hyponatremia                      | 4 (9.5%)                       | 3                                         |
| Alkaline phosphatase<br>increased | 4 (9.5%)                       | 0                                         |
| Hypokalemia                       | 2 (4.8%)                       | 1                                         |
| Hypo phosphatemia                 | 2 (4.8%)                       | 2                                         |
| Hypocalcemia                      | 2 (4.8%)                       | 1                                         |
| Hypercalcemia                     | 1 (2.4%)                       | 1                                         |

**eTable 2. DAB-Stained for Immune Markers as Part of the Trial.**

| Antibody clone                                    | Source                                      | Host          | Product No     | Dilution  | Ventana XT/incubate               | Control tissue | Staining pattern           | Program           |
|---------------------------------------------------|---------------------------------------------|---------------|----------------|-----------|-----------------------------------|----------------|----------------------------|-------------------|
| CD3-2GV6                                          | Ventana/<br>Roche<br>(Tucson,<br>AZ, USA)   | Rb<br>mono    | 52784220<br>01 | dispenser | CC1m/20m                          | spleen         | membrane                   | P305/UV           |
| CD4-SP35                                          | Ventana/<br>Roche                           | Rb<br>mono    | 55527370<br>01 | dispenser | CC1s/Option<br>5-<br>blocking/20m | spleen         | membrane                   | P306/UV           |
| CD8-SP57                                          | Ventana/<br>Roche                           | Rb<br>mono    | 59372480<br>01 | dispenser | CC1s/Option<br>5-<br>blocking/20m | spleen         | membrane                   | P307/UV           |
| FOXP3-<br>236A/E7                                 | Abcam Inc<br>(Cambridge,<br>MA,<br>USA)     | Mouse<br>mono | ab20034        | 1/100     | CC1s/60m                          | spleen         | nucleus                    | P311/UV           |
| PD-L1-<br>E1L3N                                   | CST<br>(Boston,<br>MA, USA)                 | Rb<br>mono    | 13684          | 1/100     | CC1e/120m                         | tonsil         | membrane<br>/<br>cytoplasm | P338/UV           |
| IDO-1F8.2                                         | EMD<br>Millipore<br>(Darmstadt,<br>Germany) | Mouse<br>mono | MAB1000<br>9   | 1/300     | CC1s/60m                          | spleen         | cytoplasm                  | P359/UV           |
| ultraView<br>Universal<br>DAB<br>detection<br>kit | Ventana/<br>Roche                           | -             | 760-500        | -         | -                                 | -              | -                          | ultraView<br>(UV) |

**eFigure 1. Immunohistochemistry on Paired Tumor Biopsies.**

Increase in CD3 staining indicate T cell infiltration post treatment.

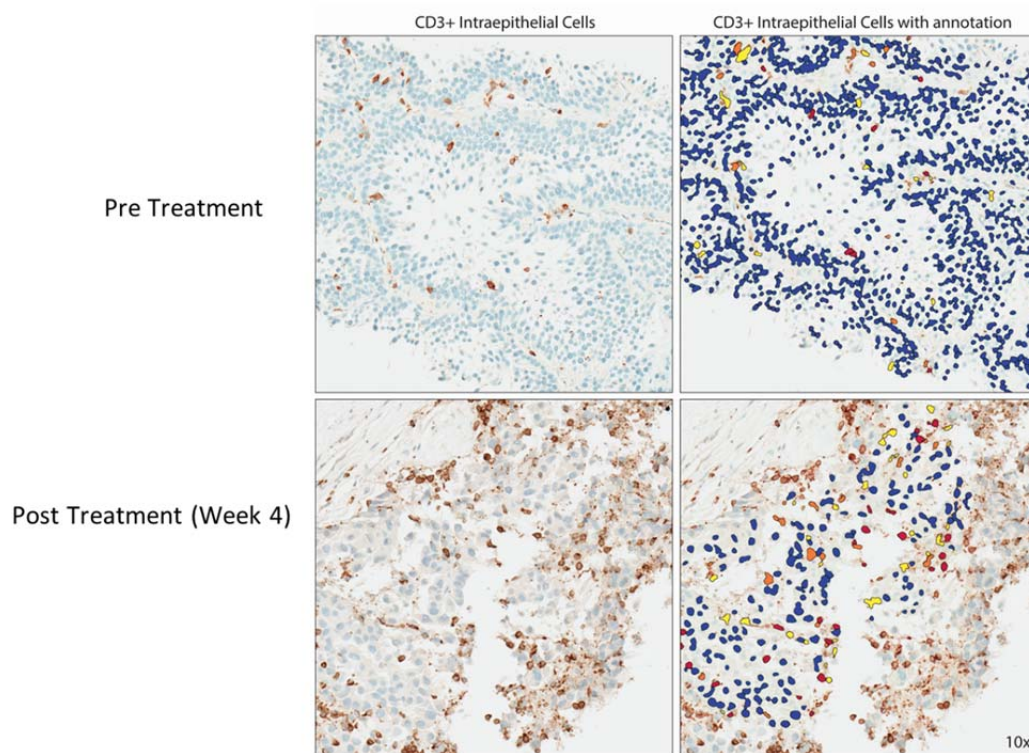

**Pre/Post treatment Biopsy:** Formalin-fixed, paraffin-embedded FFPE samples were DAB-stained for immune markers using the BenchMark XT (Ventana/Roche, Tucson, AZ, USA) (eTable 2) at Princess Margaret Cancer Centre. DAB-stained slides (CD3, CD4, CD8, FOXP3) were digitized (Aperio Scanscope XT, Leica Biosystems Inc., Buffalo Grove, IL, USA) and analyzed for percentage and intensity of staining by automated image analysis (AperioTumor-rich and tumor-negative zones were annotated and analysed separately). PD-L1 and IDO expression were scored manually for percentage cells positive.

**eFigure 2. Flow Cytometry Plots for PD-1 and ICOS on CD4+ and CD8+ CD3+ T Cells.**

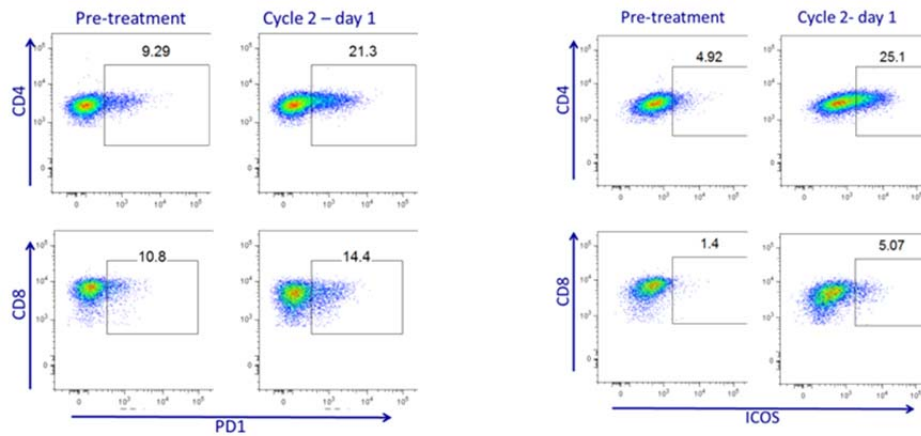

**Blood Analysis: Treg Panel:** CD3, CD45RA, CD194 (Biolegend); CD25, CD127, FOXP3, CD4 (Thermofisher); **Th Subset Panel:** CD4, CD8, CD161, CD196, CD183, CD194 (Thermofisher); **NK Panel:** CD314 (R&D); CD3, CD56, CD16, CD314, CD335, CD337 (Thermofisher); **T cell memory Panel** (CD3, CD8, CD45RA, CD28, CD95 (Thermofisher); CCR7, CD4 (Biolegend) and **T cell activation/exhaustion Panel:** CD4, PD1 (Biolegend); CD3, CD4, CD8, ICOS, HLA-DR, BTLA (Thermofisher). CD14 and CD19 were used for the dump channel in all the panels
